# Supplementary material for: Exome sequencing in patients with chronic central serous chorioretinopathy
Source: PubMed Central journal article supplement (PMC6488596; doi:10.1038/s41598-019-43152-3), 2019-04-29
Supplement: 41598_2019_43152_MOESM1_ESM.pdf [file 41598_2019_43152_MOESM1_ESM.pdf]

# Exome sequencing in patients with chronic central serous chorioretinopathy

Rosa L. Schellevis<sup>1</sup>, Myrte B. Breukink<sup>1</sup>, Christian Gilissen<sup>2</sup>, Camiel J.F. Boon<sup>3</sup>, Carel B. Hoyng<sup>1</sup>, Eiko K. de Jong\*<sup>1</sup> & Anneke I. den Hollander\*<sup>1,2</sup>

<sup>1</sup> Department of Ophthalmology, Donders Institute of Brain, Cognition, and Behaviour, *Radboud University Medical Center*, Nijmegen, the Netherlands

<sup>2</sup> Department of Genetics, Donders Institute of Brain, Cognition, and Behaviour, *Radboud University Medical Center*, Nijmegen, the Netherlands

<sup>3</sup> Department of Ophthalmology, *Leiden University Medical Center*, Leiden, the Netherlands

\* Authors contributed equally to the work

## Supplementary files

- Figure S1: Principal component analysis (PCA) of the cCSC patients and controls.
- Figure S2: Kinship analysis of cCSC patients and controls
- Figure S3: Single variant analysis of the exome sequencing results in cCSC patients and controls.
- Figure S4: Gene-based analysis in the entire cCSC cohort and the male cCSC cohort
- Figure S5: Gene expression of *DUOX1*, *LAMB3*, *PIGZ* and *RSAD1* in different tissues
- Table S1: Suggestive gene-based associations using the Burden, SKAT and SKAT-O tests
- Table S2: Variants observed in the *DUOX1*, *PIGZ*, *LAMB3* and *RSAD1* genes in the female cohort
- Table S3: Haplotypes of *LAMB3* in the female cohort
- Table S4: Male rare variant (maf<0.05) carriers in *PIGZ*, *DUOX1*, *LAMB3* and *RSAD1*
- Table S5: Gene-based results of genes in the known cCSC loci
- Script File S1: R commands performed to run the Burden, SKAT, SKAT-O and single variant analysis.

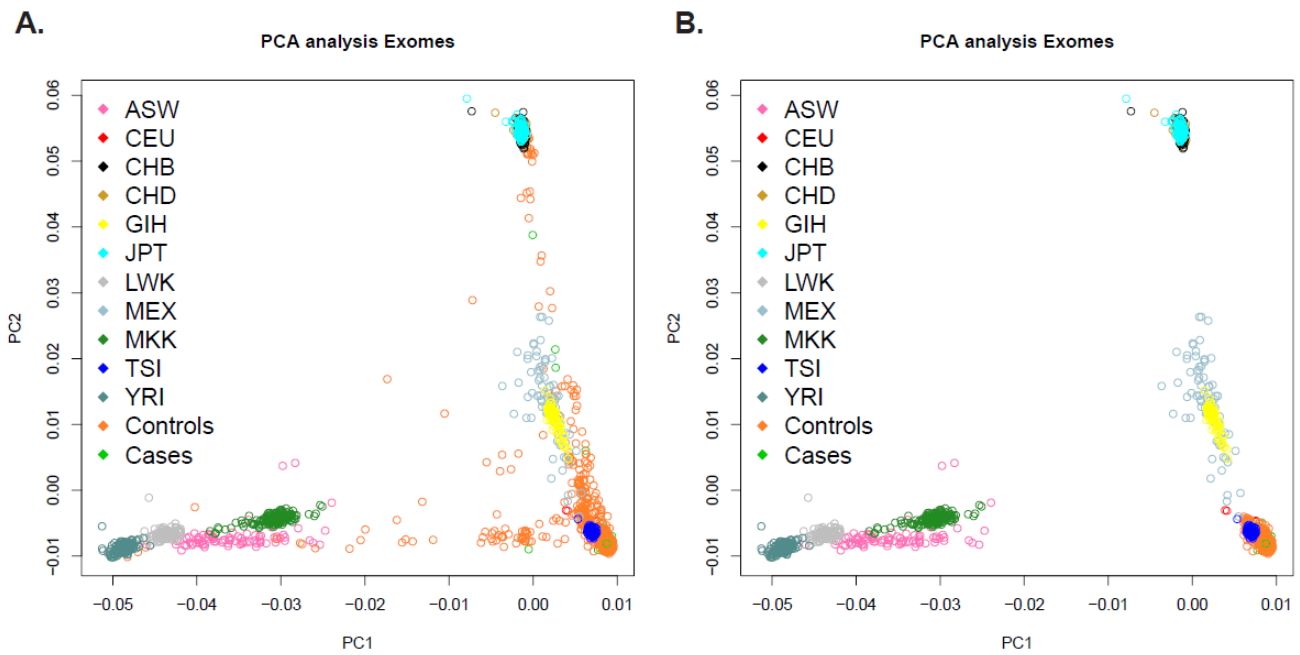

**Figure S1. Principal component analysis (PCA) of the cCSC patients and controls.** Graphical representation of the first 2 principal components of the PCA analysis, before (A) and after (B) filtering based on European ancestry. Various colours indicate the Hapmap3 samples according to the legend, orange depicts the controls and light green depicts the cCSC patients.

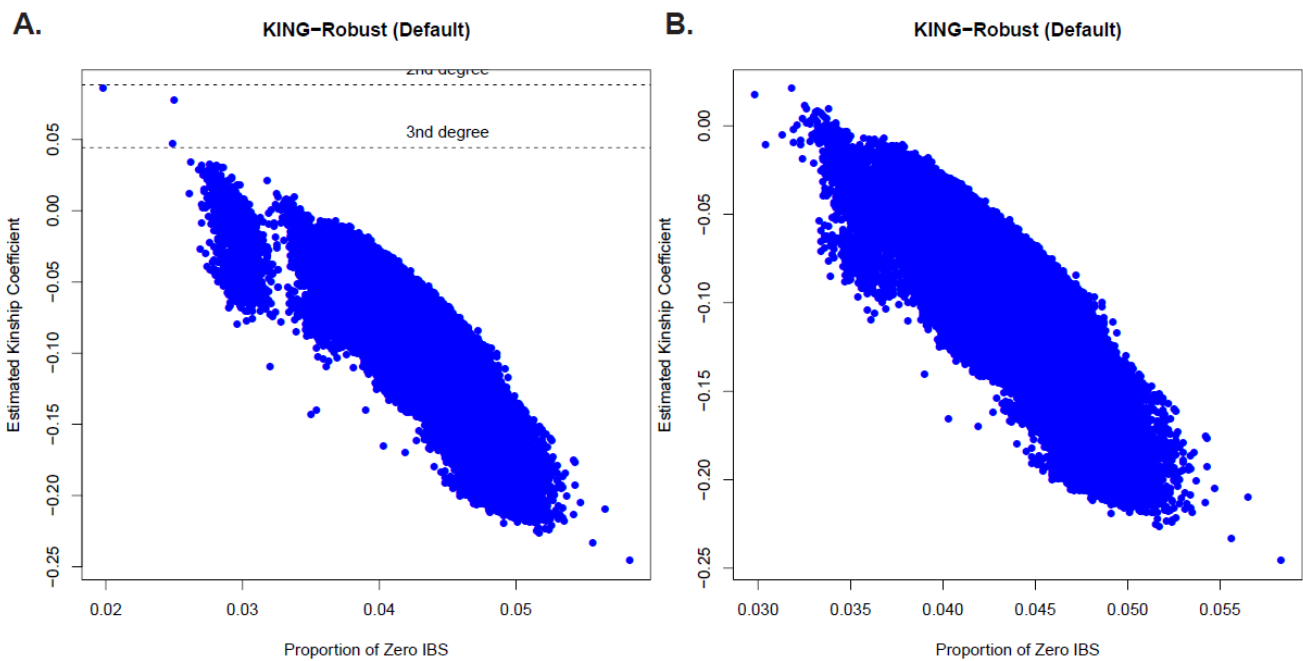

**Figure S2. Kinship analysis of cCSC patients and controls.** Kinship analysis was performed with KING, and estimated kinship coefficients of individuals in the study were calculated (A). Individuals with a kinship  $> 0.0442$  were removed from the analysis (B).

### Single variant analysis

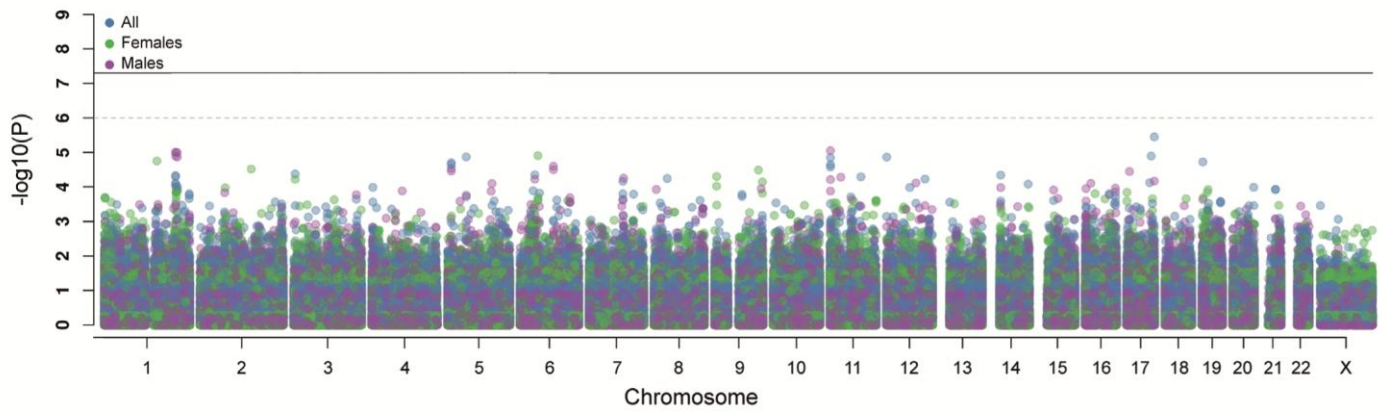

**Figure S3. Single variant analysis of the exome sequencing results in cCSC patients and controls.** Single variant analysis was performed with correction for 2 principal components and gender in the complete cohort (263 cCSC patients vs. 1352 controls [blue]), while for the females (55 cCSC patients vs. 681 controls [green]) and males (208 cCSC patients vs. 671 controls [purple]) only correction with the 2 principal components was applied. The dark horizontal line indicates the significance threshold after correction for multiple testing of  $5 \times 10^{-8}$ , while the dotted line indicates the suggestive threshold of  $P=1 \times 10^{-6}$ .

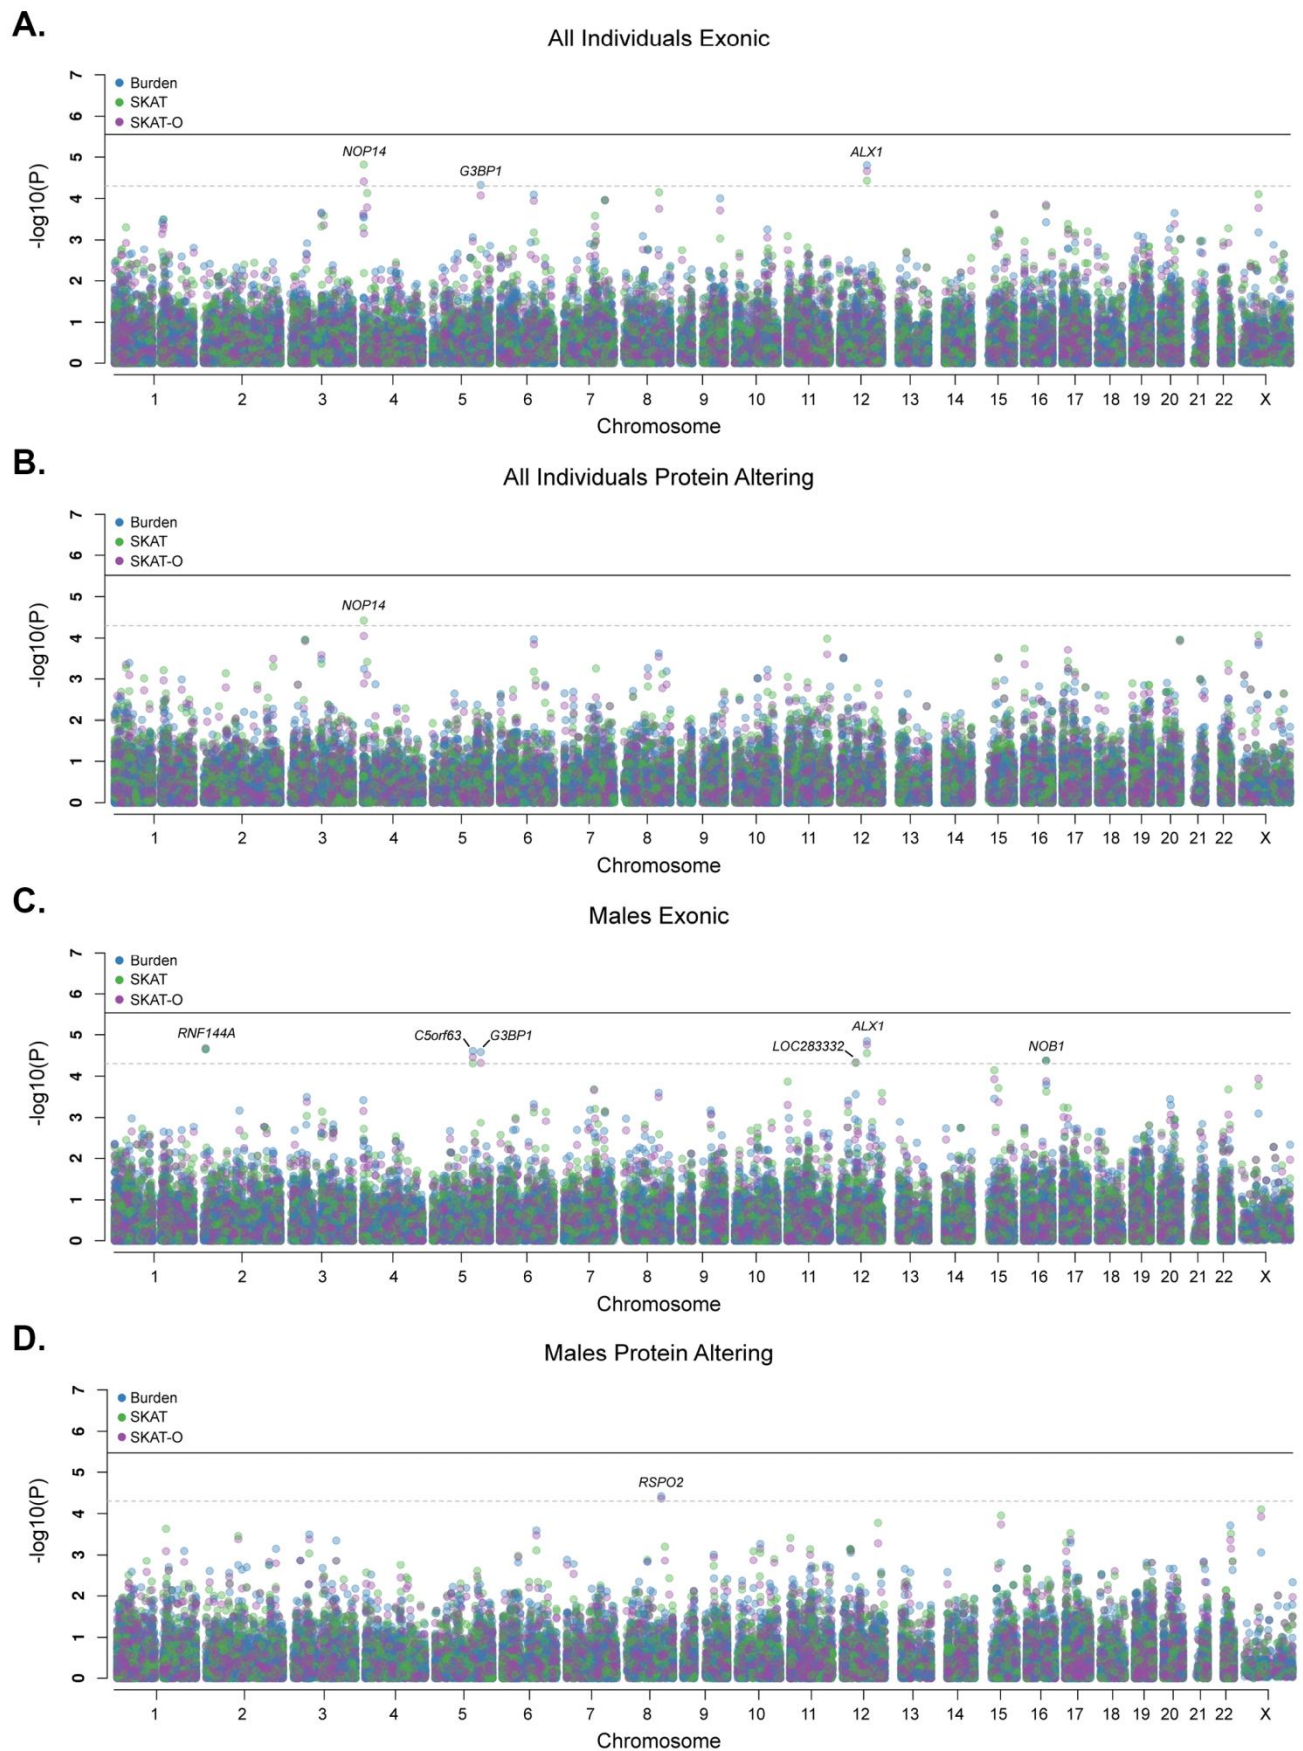

**Figure S4. Gene-burden analysis all cCSC individuals and the male cCSC cohort.**

Burden (blue), SKAT (green) and SKAT-O (purple) association results are depicted for the complete cohort of 263 cCSC patients and 1352 controls corrected for gender and 2 principal components, using the Exonic (A) and Protein Altering (B) group files. The results the gene-burden test in the 208 male cCSC patients and 671 male controls, for both group files are also depicted (C+D). The dark horizontal line indicates the significance threshold after correction for multiple testing:  $0.05/18,173 \text{ genes}=2.75 \times 10^{-6}$  (A),  $0.05/16,370 \text{ genes}=3.05 \times 10^{-6}$  (B),  $0.05/17,348 \text{ genes}=2.88 \times 10^{-6}$  (C) and  $0.05/15,083 \text{ genes}=3.31 \times 10^{-6}$  (D), while the dotted line indicates the suggestive threshold of  $P=5 \times 10^{-5}$ .

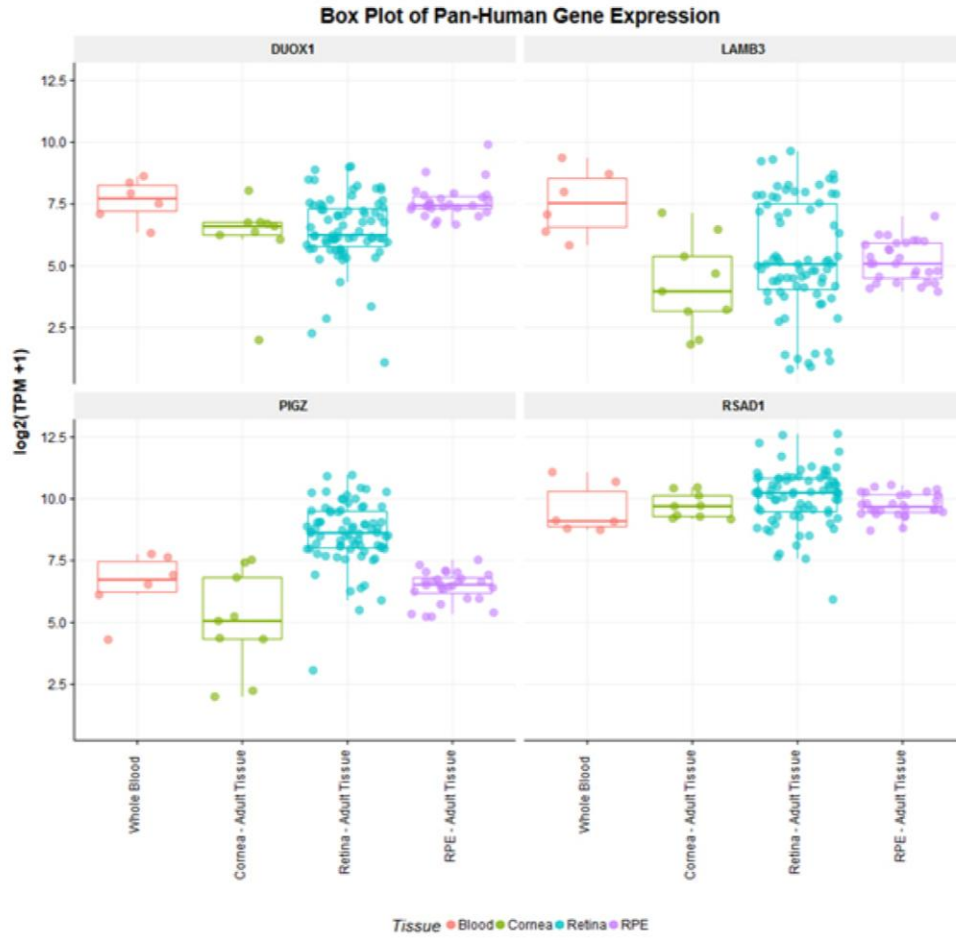

**Figure S5. Gene expression of *DUOX1*, *LAMB3*, *PIGZ* and *RSAD1* in different tissues.**

Pan-Human Gene Expression levels of the four susceptibility genes in females according to the eyeintegration database v0.63 (27). Whole blood (red), Cornea (green), retina (blue) and retinal pigment epithelium (RPE, purple) expression levels are depicted.

| Table S1. Suggestive gene-based associations using the Burden, SKAT and SKAT-O tests |                             |                                                  |                                                  |                                                  |
|--------------------------------------------------------------------------------------|-----------------------------|--------------------------------------------------|--------------------------------------------------|--------------------------------------------------|
| <i>Gene</i>                                                                          | <i>Variants</i>             | <i>Burden p-value</i>                            | <i>SKAT p-value</i>                              | <i>SKAT-O p-value</i>                            |
| <b>All individuals</b>                                                               |                             |                                                  |                                                  |                                                  |
| <i>ALX1</i>                                                                          | Exonic                      | 1.57x10 <sup>-5</sup>                            | 3.71x10 <sup>-5</sup>                            | 2.17x10 <sup>-5</sup>                            |
| <i>NOP14</i>                                                                         | Protein-altering/<br>Exonic | 3.02x10 <sup>-2</sup> /<br>2.49x10 <sup>-2</sup> | 3.76x10 <sup>-5</sup> /<br>1.52x10 <sup>-5</sup> | 8.88x10 <sup>-5</sup> /<br>3.88x10 <sup>-5</sup> |
| <i>G3BP1</i>                                                                         | Exonic                      | 4.72x10 <sup>-5</sup>                            | 1.71x10 <sup>-3</sup>                            | 8.45 x10 <sup>-5</sup>                           |
| <b>Males</b>                                                                         |                             |                                                  |                                                  |                                                  |
| <i>RSPO2</i>                                                                         | Protein-altering            | 3.81x10 <sup>-5</sup>                            | 1.95x10 <sup>-2</sup>                            | 4.37x10 <sup>-5</sup>                            |
| <i>ALX1</i>                                                                          | Exonic                      | 1.43x10 <sup>-5</sup>                            | 2.80x10 <sup>-5</sup>                            | 1.74x10 <sup>-5</sup>                            |
| <i>RNF144A</i>                                                                       | Exonic                      | 2.25x10 <sup>-5</sup>                            | 2.25x10 <sup>-5</sup>                            | 2.12x10 <sup>-5</sup>                            |
| <i>C5orf63</i>                                                                       | Exonic                      | 2.48x10 <sup>-5</sup>                            | 4.92x10 <sup>-5</sup>                            | 3.49x10 <sup>-5</sup>                            |
| <i>NOB1</i>                                                                          | Exonic                      | 4.24x10 <sup>-5</sup>                            | 4.24x10 <sup>-5</sup>                            | 4.24x10 <sup>-5</sup>                            |
| <i>LOC283332</i>                                                                     | Exonic                      | 2.77x10 <sup>-4</sup>                            | 4.81x10 <sup>-5</sup>                            | 4.64x10 <sup>-5</sup>                            |
| <i>G3BP1</i>                                                                         | Exonic                      | 2.63x10 <sup>-5</sup>                            | 1.36x10 <sup>-3</sup>                            | 4.81x10 <sup>-5</sup>                            |
| <b>Females</b>                                                                       |                             |                                                  |                                                  |                                                  |
| <i>ZNF713</i>                                                                        | Exonic                      | 1.68x10 <sup>-4</sup>                            | 3.40x10 <sup>-6</sup>                            | 4.86x10 <sup>-6</sup>                            |
| <i>SPATA7</i>                                                                        | Exonic                      | 7.11x10 <sup>-6</sup>                            | 2.30x10 <sup>-5</sup>                            | 5.35x10 <sup>-6</sup>                            |
| <i>C1QL3</i>                                                                         | Exonic                      | 1.68x10 <sup>-4</sup>                            | 1.03x10 <sup>-5</sup>                            | 1.10x10 <sup>-5</sup>                            |
| <i>GAPVD1</i>                                                                        | Exonic                      | 1.45x10 <sup>-2</sup>                            | 7.43x10 <sup>-6</sup>                            | 1.99x10 <sup>-5</sup>                            |
| <i>ZNF300P1</i>                                                                      | Exonic                      | 3.33x10 <sup>-5</sup>                            | 3.33x10 <sup>-5</sup>                            | 3.16x10 <sup>-5</sup>                            |
| <i>LIPH</i>                                                                          | Exonic                      | 4.73x10 <sup>-5</sup>                            | 4.73x10 <sup>-5</sup>                            | 4.64x10 <sup>-5</sup>                            |
| <i>TDGF1</i>                                                                         | Protein-altering            | 4.89x10 <sup>-5</sup>                            | 4.89x10 <sup>-5</sup>                            | 4.64x10 <sup>-5</sup>                            |
| <i>OR5H14</i>                                                                        | Exonic                      | 4.67 x10 <sup>-5</sup>                           | 9.33x10 <sup>-4</sup>                            | 5.42x10 <sup>-5</sup>                            |
| <i>RSL1D1</i>                                                                        | Protein-altering            | 3.52x10 <sup>-5</sup>                            | 4.28x10 <sup>-4</sup>                            | 9.66x10 <sup>-5</sup>                            |

| Table S4. Male rare variant (MAF <0.05) carriers in <i>PIGZ</i> , <i>DUOX1</i> , <i>LAMB3</i> and <i>RSAD1</i> |                           |                  |                       |         |                  |
|----------------------------------------------------------------------------------------------------------------|---------------------------|------------------|-----------------------|---------|------------------|
|                                                                                                                | No. rare variants in gene | Controls (n=671) | cCSC patients (n=208) | P-value | OR (95% CI)      |
| <i>LAMB3</i>                                                                                                   | 32                        | 81 (12.1%)       | 20 (9.6%)             | 0.38    | 0.78 (0.46-1.30) |
| <i>PIGZ</i>                                                                                                    | 19                        | 35 (5.2%)        | 7 (3.4%)              | 0.35    | 0.63 (0.28-1.45) |
| <i>DUOX1</i>                                                                                                   | 23                        | 24 (3.6%)        | 8 (3.8%)              | 1.00    | 1.08 (0.48-2.44) |
| <i>RSAD1</i>                                                                                                   | 4                         | 7 (1.0%)         | 1 (0.5%)              | 0.69    | 0.46 (0.06-3.73) |
| Variant in 1 or more genes                                                                                     |                           | 137 (20.4%)      | 33 (15.9%)            | 0.15    | 0.74 (0.49-1.12) |

Table S2. Variants observed in the *DUOX1*, *PIGZ*, *LAMB3* and *RSAD1* genes in the female cohort

| Gene                        | Variant     | Exon   | Effect   | Nucleotide change | Protein change | SKAT P-value   | SAS P-value          | OR (95% CI)          | Weight   | Counts             | Counts                  | MAF cCSC | MAF controls | Exac_NFE | PhyloP | Grantham | Mutation Taster |           |                 |                  |             |
|-----------------------------|-------------|--------|----------|-------------------|----------------|----------------|----------------------|----------------------|----------|--------------------|-------------------------|----------|--------------|----------|--------|----------|-----------------|-----------|-----------------|------------------|-------------|
|                             |             |        |          |                   |                |                |                      |                      |          | female cCSC (n=55) | female controls (n=681) |          |              |          |        |          | (score)         | CADD      | Sift (score)    | Polyphen (score) | Trap(score) |
| <i>DUOX1</i><br>(NM_175940) | rs764911806 | 5      | nonsyn   | c.C411G           | p.D137E        | 0.50           | 0.54                 | 4.09 (0.04-381.40)   | 1.00E+00 | 0                  | 1                       | 0        | 7.34E-04     | 1.00E-04 | 0.25   | 45       | N(1)            | 15.8      | T (0.361)       | B (0.036)        | 0.147       |
|                             | rs200421952 | 14     | nonsyn   | c.G1627A          | p.A543T        | 0.55           | 0.64                 | 2.46 (0.06-102.04)   | 1.00E+00 | 0                  | 2                       | 0        | 1.47E-03     | 7.00E-04 | 1.61   | 58       | N(0.953)        | 13.6      | T (0.159)       | B (0.124)        | 0.001       |
|                             | rs201198610 | 15     | nonsyn   | c.T1778C          | p.F593S        | 0.54           | 0.54                 | 4.09 (0.04-381.40)   | 1.00E+00 | 0                  | 1                       | 0        | 7.34E-04     | 6.00E-04 | 1.29   | 155      | D(0.558)        | 20.9      | T (0.45)        | B (0.138)        | 0.012       |
|                             | rs370633829 | 15     | nonsyn   | c.G1786A          | p.G596R        | <b>0.044</b>   | 0.12                 | 37.16 (0.40->999.99) | 1.00E+00 | 1                  | 0                       | 9.09E-03 | 0            | 7.50E-05 | 1.53   | 125      | N(0.643)        | 24.4      | T (0.068)       | D (0.999)        | 0.234       |
|                             | rs143304688 | 17     | stopgain | c.C1948T          | p.Q650*        | 0.55           | 0.54                 | 4.09 (0.04-381.40)   | 1.00E+00 | 0                  | 1                       | 0        | 7.34E-04     | 1.70E-03 | .      | .        | A(1)            | 44.0      | .               | .                | 0.773       |
|                             | rs368978619 | 18     | nonsyn   | c.T2152A          | p.L718M        | 0.57           | 0.64                 | 2.46 (0.06-102.04)   | 1.00E+00 | 0                  | 2                       | 0        | 1.47E-03     | 2.00E-04 | 0.06   | 15       | N(1)            | 8.1       | T (0.266)       | B (0.003)        | 0.004       |
|                             | rs373898472 | 21     | nonsyn   | c.G2750T          | p.W917L        | 0.54           | 0.54                 | 4.09 (0.04-381.40)   | 1.00E+00 | 0                  | 1                       | 0        | 7.34E-04     | 3.00E-05 | 3.56   | 61       | D(1)            | 17.0      | T (0.831)       | D (0.957)        | 0.021       |
|                             | rs145668427 | 21     | nonsyn   | c.C2773T          | p.R925W        | <b>0.0024</b>  | <b>0.03</b>          | 62.69 (1.52->999.99) | 1.00E+00 | 2                  | 0                       | 0.018    | 0            | 2.40E-03 | 0.99   | 101      | D(1)            | 34.0      | D (0.004)       | D (1)            | 0.048       |
|                             | rs148902727 | 21     | nonsyn   | c.C2794T          | p.R932C        | 0.57           | 0.64                 | 2.46 (0.06-102.04)   | 1.00E+00 | 0                  | 2                       | 0        | 1.47E-03     | 5.00E-04 | 3.23   | 180      | D(1)            | 26.6      | D (0.014)       | D (1)            | 0.038       |
|                             | rs16939752  | 24     | nonsyn   | c.T3076C          | p.C1026R       | 0.33           | 0.30                 | 1.35 (0.77-2.37)     | 1.09E-03 | 15                 | 146                     | 0.136    | 0.107        | 0.127    | 0.98   | 180      | P(0.899)        | 15.4      | T (0.364)       | B (0)            | 0.026       |
|                             | rs777590867 | 24     | nonsyn   | c.G3170C          | p.G1057A       | 0.051          | 0.08                 | 12.41 (0.77-199.80)  | 1.00E+00 | 1                  | 1                       | 0.01     | 7.34E-04     | 1.52E-05 | 1.46   | 60       | D(1)            | 10.9      | T (0.38)        | Prob. D (0.661)  | 0.014       |
|                             | rs2458236   | 27     | nonsyn   | c.C3532T          | p.L1178F       | 0.99           | 0.91                 | 0.98 (0.65-1.47)     | 2.24E-17 | 37                 | 467                     | 0.336    | 0.343        | 0.674    | 0.85   | 22       | P(0.999)        | 20.5      | T (0.439)       | B (0.002)        | 0.09        |
|                             | rs142004175 | 28     | nonsyn   | c.G3644A          | p.R1215H       | 0.56           | 0.54                 | 4.09 (0.04-381.40)   | 1.00E+00 | 0                  | 1                       | 0        | 7.34E-04     | 1.60E-03 | 3.38   | 29       | D(1)            | 33.0      | D (0.002)       | D (1)            | 0.059       |
|                             | rs138894830 | 28     | nonsyn   | c.G3656A          | p.R1219Q       | 0.51           | 0.54                 | 4.09 (0.04-381.40)   | 1.00E+00 | 0                  | 1                       | 0        | 7.34E-04     | 1.30E-03 | 3.38   | 43       | D(1)            | 23.8      | T (0.277)       | Prob. D (0.706)  | 0.332       |
| rs773444369                 | 33          | nonsyn | c.C4462T | p.R1488C          | 0.55           | 0.54           | 4.09 (0.04-381.40)   | 1.00E+00             | 0        | 1                  | 0                       | 7.34E-04 | 4.50E-05     | 2.20     | 180    | D(1)     | 33.0            | D (0)     | D (1)           | 0.116            |             |
| <i>PIGZ</i><br>(NM_025163)  | rs74554271  | 2      | nonsyn   | c.C65T            | p.P22L         | 0.54           | 0.54                 | 4.09 (0.04-381.40)   | 1.00E+00 | 0                  | 1                       | 0        | 7.34E-04     | 2.00E-04 | 0.26   | 98       | N(1)            | 16.23     | D (0.015)       | B (0.002)        | 0.021       |
|                             | rs780890452 | 3      | nonsyn   | c.C308T           | p.T103I        | 0.53           | 0.54                 | 4.09 (0.04-381.40)   | 1.00E+00 | 0                  | 1                       | 0        | 7.34E-04     | 9.98E-05 | 2.40   | 89       | D(1)            | 15.80     | D (0.018)       | B (0.036)        | 0.214       |
|                             | rs200901195 | 3      | nonsyn   | c.G323A           | p.R108K        | 0.53           | 0.54                 | 4.09 (0.04-381.40)   | 1.00E+00 | 0                  | 1                       | 0        | 7.34E-04     | 2.00E-04 | 0.29   | 26       | D(1)            | 9.08      | T (1)           | B (0)            | 0.475       |
|                             | rs199852771 | 3      | nonsyn   | c.C344T           | p.P115L        | 0.60           | 0.75                 | 1.76 (0.06-54.12)    | 1.00E+00 | 0                  | 3                       | 0        | 2.20E-03     | 4.00E-04 | -0.93  | 98       | N(1)            | 0.00      | T (0.407)       | B (0)            | 0.123       |
|                             | rs144088027 | 3      | nonsyn   | c.C371T           | p.A124V        | <b>0.00046</b> | <b>0.00030</b>       | 16.40 (3.64-73.94)   | 1.00E+00 | 4                  | 3                       | 0.036    | 2.20E-03     | 5.70E-03 | -1.40  | 64       | N(1)            | 0.00      | T (1)           | B (0.002)        | 0.144       |
|                             | rs150001262 | 3      | nonsyn   | c.G464A           | p.R155H        | 0.53           | 0.54                 | 4.09 (0.04-381.40)   | 1.00E+00 | 0                  | 1                       | 0        | 7.34E-04     | 1.30E-03 | 0.66   | 29       | D(1)            | 23.20     | T (0.129)       | D (1)            | 0.128       |
|                             | rs148186466 | 3      | nonsyn   | c.G725T           | p.G242V        | 0.63           | 0.85                 | 1.364 (0.052-36.04)  | 1.00E+00 | 0                  | 4                       | 0        | 2.94E-03     | 2.00E-04 | 0.78   | 109      | D(0.821)        | 16.08     | T (0.164)       | Prob. D (0.934)  | 0.327       |
|                             | rs574365    | 3      | nonsyn   | c.G796A           | p.A266T        | 0.58           | 0.56                 | 0.87 (0.55-1.39)     | 2.11E-12 | 24                 | 334                     | 0.218    | 0.245        | 0.744    | 0.20   | 58       | P(1)            | 0.27      | T (0.323)       | B (0.001)        | 0.063       |
|                             | rs140946995 | 3      | nonsyn   | c.C821T           | p.A274V        | 0.57           | 0.64                 | 2.46 (0.06-102.04)   | 1.00E+00 | 0                  | 2                       | 0        | 1.47E-03     | 1.50E-03 | 1.61   | 64       | N(1)            | 0.00      | T (1)           | B (0.136)        | 0.064       |
|                             | rs148546943 | 3      | nonsyn   | c.C864A           | p.N288K        | 0.54           | 0.54                 | 4.09 (0.04-381.40)   | 1.00E+00 | 0                  | 1                       | 0        | 7.34E-04     | 1.57E-04 | 0.52   | 94       | .               | 0.03      | T (0.49)        | B (0.002)        | 0.011       |
|                             | rs149631795 | 3      | nonsyn   | c.C1010T          | p.A337V        | 0.55           | 0.54                 | 4.09 (0.04-381.40)   | 1.00E+00 | 0                  | 1                       | 0        | 7.34E-04     | 4.00E-04 | 0.76   | 64       | N(1)            | 7.99      | T (0.164)       | Prob. D (0.919)  | 0.078       |
|                             | rs4916589   | 3      | nonsyn   | c.G1019A          | p.R340Q        | 0.75           | 0.72                 | 0.93 (0.63-1.38)     | 9.96E-23 | 43                 | 557                     | 0.391    | 0.409        | 0.596    | 0.46   | 43       | P(1)            | 8.52      | T (0.505)       | B (0)            | 0.166       |
|                             | rs150517093 | 3      | nonsyn   | c.C1078T          | p.R360W        | 0.54           | 0.54                 | 4.09 (0.04-381.40)   | 1.00E+00 | 0                  | 1                       | 0        | 7.34E-04     | 4.00E-04 | -2.76  | 101      | N(1)            | 0.00      | T (0.188)       | B (0.001)        | 0.009       |
|                             | rs1147238   | 3      | nonsyn   | c.T1250C          | p.V417A        | 0.47           | 0.42                 | 1.24 (0.73-2.09)     | 3.51E-05 | 18                 | 189                     | 0.164    | 0.139        | 0.141    | 0.98   | 64       | P(0.947)        | 7.25      | T (0.252)       | B (0.007)        | 0.081       |
| rs150414171                 | 3           | nonsyn | c.G1401C | p.M467I           | 0.11           | 0.09           | 7.45 (0.71-77.77)    | 1.00E+00             | 1        | 2                  | 9.09E-03                | 1.47E-03 | 1.90E-03     | 3.82     | 10     | D(0.937) | 25.20           | D (0.036) | D (1)           | 0.043            |             |
| rs17855662                  | 3           | nonsyn | c.G1461A | p.M487I           | 0.14           | 0.19           | 0.55 (0.23-1.33)     | 8.97E-02             | 5        | 117                | 0.045                   | 0.086    | 0.084        | 2.20     | 10     | N(0.712) | 22.10           | T (0.143) | Prob. D (0.524) | 0.431            |             |
| rs202156268                 | 3           | nonsyn | c.G1466A | p.G489E           | 0.50           | 0.54           | 4.09 (0.04-381.40)   | 1.00E+00             | 0        | 1                  | 0                       | 7.34E-04 | 3.00E-05     | 3.82     | 98     | D(0.931) | 24.90           | D (0.005) | D (0.998)       | 0.297            |             |
| rs146219795                 | 3           | nonsyn | c.G1591A | p.V531M           | <b>0.042</b>   | 0.12           | 37.16 (0.40->999.99) | 1.00E+00             | 1        | 0                  | 9.09E-03                | 0        | 5.00E-04     | -0.60    | 21     | N(1)     | 2.73            | T (0.18)  | Prob. D (0.539) | 0.01             |             |



|             |        |        |          |          |         |         |                      |          |    |     |          |          |          |        |     |          |       |          |          |       |
|-------------|--------|--------|----------|----------|---------|---------|----------------------|----------|----|-----|----------|----------|----------|--------|-----|----------|-------|----------|----------|-------|
| rs140470350 | 1      | syn    | c.C15T   | p.F5F    | 0.53    | 0.54    | 4.09 (0.04-381.40)   | 1.00E+00 | 0  | 1   | 0        | 7.34E-04 | 2.60E-03 | .      | .   | .        | .     | .        | .        | 0.096 |
| rs2228339   | 2      | syn    | c.C138T  | p.T46T   | 0.77    | 0.76    | 1.07 (0.68-1.70)     | 2.84E-11 | 26 | 308 | 0.236    | 0.226    | 0.245    | .      | .   | .        | .     | .        | .        | 0.044 |
| rs2076356   | 3      | syn    | c.A291C  | p.S97S   | 0.06    | 0.07    | 1.44 (0.97-2.14)     | 2.06E-18 | 46 | 454 | 0.418    | 0.333    | 0.659    | .      | .   | .        | .     | .        | .        | 0.023 |
| rs2235542   | 5      | nsyn   | c.A541G  | p.N181D  | 0.00015 | <0.0001 | 5.11 (2.33-11.22)    | 9.99E-01 | 9  | 24  | 8.18E-02 | 1.76E-02 | 2.26E-02 | 0.953  | 23  | P(1)     | 5.937 | T(0.461) | B(0.036) | 0     |
| rs150895872 | 5      | nsyn   | c.G548A  | p.R183H  | 0.57    | 0.54    | 4.09 (0.04-381.40)   | 1.00E+00 | 0  | 1   | 0        | 7.34E-04 | 1.40E-03 | 0.015  | 29  | N(1)     | 12.49 | T(0.282) | B(0.004) | 0.054 |
| rs121912482 | 6      | nsyn   | c.G628A  | p.E210K  | 0.55    | 0.54    | 4.09 (0.04-381.40)   | 1.00E+00 | 0  | 1   | 0        | 7.34E-04 | .        | 1.461  | 56  | A(0.922) | 22.5  | T(0.398) | B(0.238) | 0.988 |
| rs141059189 | 8      | syn    | c.C927T  | p.D309D  | 0.51    | 0.54    | 4.09 (0.04-381.40)   | 1.00E+00 | 0  | 1   | 0        | 7.34E-04 | 3.00E-04 | .      | .   | .        | .     | .        | .        | 0.028 |
| rs886045867 | 8      | syn    | c.A943C  | p.R315R  | 0.53    | 0.54    | 4.09 (0.04-381.40)   | 1.00E+00 | 0  | 1   | 0        | 7.34E-04 | .        | .      | .   | .        | .     | .        | .        | 0.875 |
| rs52814161  | 9      | nsyn   | c.T1015C | p.Y339H  | 0.15    | 0.15    | 2.37 (0.72-7.75)     | 1.00E+00 | 3  | 18  | 2.73E-02 | 1.32E-02 | 1.72E-02 | 1.190  | 83  | N(1)     | 7.697 | T(0.287) | B(0)     | 0.008 |
| rs114875539 | 9      | nsyn   | c.G1051A | p.E351K  | 0.57    | 0.64    | 2.46 (0.06-102.04)   | 1.00E+00 | 0  | 2   | 0        | 1.47E-03 | 1.60E-03 | 1.145  | 56  | N(1)     | 17.25 | T(0.333) | D(0.998) | 0     |
| rs548096567 | 9      | nsyn   | c.C1069T | p.R357W  | 0.037   | 0.12    | 37.16 (0.40->999.99) | 1.00E+00 | 1  | 0   | 9.09E-03 | 0        | 0        | 0.351  | 101 | N(1)     | 33    | D(0.004) | D(1)     | 0.157 |
| rs2076351   | 10     | syn    | c.G1149A | p.P383P  | 0.69    | 0.90    | 0.82 (0.04-17.55)    | 1.00E+00 | 0  | 7   | 0        | 5.14E-03 | 5.90E-03 | .      | .   | .        | .     | .        | .        | 0.003 |
| rs779219301 | 10     | nsyn   | c.G1189A | p.G397R  | 0.52    | 0.54    | 4.09 (0.04-381.40)   | 1.00E+00 | 0  | 1   | 0        | 7.34E-04 | 5.38E-05 | 5.261  | 125 | D(1)     | 29.4  | D(0.001) | D(1)     | 0.38  |
| 1:209801457 | 10     | nsyn   | c.A1211G | p.H404R  | 0.53    | 0.54    | 4.09 (0.04-381.40)   | 1.00E+00 | 0  | 1   | 0        | 7.34E-04 | .        | 4.536  | 29  | N(0.859) | 13.61 | D(0.017) | B(0.101) | 0.307 |
| rs2229468   | 11     | nsyn   | c.T1312A | p.S438T  | 0.54    | 0.54    | 4.09 (0.04-381.40)   | 1.00E+00 | 0  | 1   | 0        | 7.34E-04 | 3.00E-04 | -0.062 | 58  | P(1)     | 4.981 | T(1)     | B(0.002) | 0.056 |
| rs762400142 | 11     | syn    | c.G1347A | p.G449G  | 0.54    | 0.54    | 4.09 (0.04-381.40)   | 1.00E+00 | 0  | 1   | 0        | 7.34E-04 | 0        | .      | .   | .        | .     | .        | .        | 0.018 |
| 1:209800257 | 12     | stgain | c.C1552T | p.Q518X  | 0.54    | 0.54    | 4.09 (0.04-381.40)   | 1.00E+00 | 0  | 1   | 0        | 7.34E-04 | .        | .      | .   | A(1)     | 38    | .        | .        | 0.015 |
| rs771727419 | 12     | nsyn   | c.G1574C | p.G525A  | 0.54    | 0.54    | 4.09 (0.04-381.40)   | 1.00E+00 | 0  | 1   | 0        | 7.34E-04 | 1.55E-05 | 5.575  | 60  | D(1)     | 24.9  | D(0.008) | D(1)     | 0.102 |
| 1:209800233 | 12     | nsyn   | c.G1576A | p.D526N  | 0.56    | 0.54    | 4.09 (0.04-381.40)   | 1.00E+00 | 0  | 1   | 0        | 7.34E-04 | .        | 1.497  | 23  | N(0.98)  | 17.93 | D(0.016) | D(0.974) | 0.005 |
| rs2076349   | 12     | nsyn   | c.G1579A | p.V527M  | 0.00091 | 0.0005  | 3.83 (1.79-8.19)     | 9.99E-01 | 9  | 32  | 8.18E-02 | 2.35E-02 | 2.76E-02 | -0.266 | 21  | P(1)     | 10.99 | T(0.068) | P(0.596) | 0.007 |
| rs767004520 | 13     | nsyn   | c.C1654T | p.R552C  | 0.031   | 0.12    | 37.16 (0.40->999.99) | 1.00E+00 | 1  | 0   | 9.09E-03 | 0        | 1.00E-04 | 2.557  | 180 | D(0.999) | 34    | D(0.006) | D(1)     | 0.02  |
| rs2179402   | 13     | syn    | c.T1716C | p.C572C  | 0.19    | 0.19    | 1.32 (0.87-1.99)     | 2.94E-14 | 36 | 369 | 0.327    | 0.271    | 0.747    | .      | .   | .        | .     | .        | .        | 0.014 |
| rs370280436 | 13     | nsyn   | c.G1721A | p.R574H  | 0.57    | 0.64    | 2.46 (0.06-102.04)   | 1.00E+00 | 0  | 2   | 0        | 1.47E-03 | 7.64E-05 | 0.516  | 29  | N(0.978) | 21.9  | T(0.069) | B(0.039) | 0.002 |
| rs771720883 | 13     | syn    | c.G1728A | p.P576P  | 0.52    | 0.54    | 4.09 (0.04-381.40)   | 1.00E+00 | 0  | 1   | 0        | 7.34E-04 | 1.00E-04 | .      | .   | .        | .     | .        | .        | 0.024 |
| rs2229465   | 13     | syn    | c.T1764C | p.Y588Y  | 0.00019 | <0.0001 | 4.91 (2.25-10.74)    | 9.99E-01 | 9  | 25  | 8.18E-02 | 1.84E-02 | 2.45E-02 | .      | .   | .        | .     | .        | .        | 0.002 |
| rs760667887 | 13     | nsyn   | c.G1853A | p.R618H  | 0.54    | 0.54    | 4.09 (0.04-381.40)   | 1.00E+00 | 0  | 1   | 0        | 7.34E-04 | 3.01E-05 | -4.245 | 29  | N(1)     | 0.066 | T(0.574) | B(0)     | 0     |
| rs80356682  | 13     | stgain | c.C1903T | p.R635X  | 0.14    | 0.09    | 7.45 (0.71-77.77)    | 1.00E+00 | 1  | 2   | 9.09E-03 | 1.47E-03 | 1.30E-03 | .      | .   | A(1)     | 36    | .        | .        | 0.007 |
| 1:209799027 | 13     | nsyn   | c.G1942A | p.V648M  | 0.55    | 0.54    | 4.09 (0.04-381.40)   | 1.00E+00 | 0  | 1   | 0        | 7.34E-04 | .        | 0.301  | 21  | N(0.976) | 21.2  | T(0.052) | B(0.048) | 0.017 |
| 1:209799011 | 13     | nsyn   | c.G1958T | p.S653I  | 0.50    | 0.54    | 4.09 (0.04-381.40)   | 1.00E+00 | 0  | 1   | 0        | 7.34E-04 | .        | 0.199  | 142 | N(1)     | 24.6  | D(0.005) | P(0.641) | 0.019 |
| rs2229466   | 14     | nsyn   | c.A2069G | p.N690S  | 0.00014 | <0.0001 | 5.11 (2.33-11.22)    | 9.99E-01 | 9  | 24  | 8.18E-02 | 1.76E-02 | 2.21E-02 | 0.225  | 46  | P(1)     | 0.003 | T(0.243) | B(0.003) | 0.271 |
| rs2072937   | 14     | syn    | c.T2124C | p.S708S  | 0.00014 | <0.0001 | 5.11 (2.33-11.22)    | 9.99E-01 | 9  | 24  | 8.18E-02 | 1.76E-02 | 2.21E-02 | .      | .   | .        | .     | .        | .        | 0.041 |
| rs778247685 | 15     | nsyn   | c.C2209T | p.R737C  | 0.039   | 0.12    | 37.16 (0.40->999.99) | 1.00E+00 | 1  | 0   | 9.09E-03 | 0        | 1.51E-05 | -0.134 | 180 | N(1)     | 16.04 | T(0.061) | P(0.876) | 0.052 |
| rs113745536 | 15     | syn    | c.G2298A | p.K766K  | 0.57    | 0.64    | 2.46 (0.06-102.04)   | 1.00E+00 | 0  | 2   | 0        | 1.47E-03 | 8.00E-04 | .      | .   | .        | .     | .        | .        | 0.005 |
| 1:209796424 | 16     | nsyn   | c.G2459A | p.G820D  | 0.52    | 0.54    | 4.09 (0.04-381.40)   | 1.00E+00 | 0  | 1   | 0        | 7.34E-04 | .        | 4.023  | 94  | D(1)     | 29.5  | D(0.004) | D(1)     | 0.088 |
| rs151006337 | 17     | nsyn   | c.C2564G | p.A855G  | 0.55    | 0.64    | 2.46 (0.06-102.04)   | 1.00E+00 | 0  | 2   | 0        | 1.47E-03 | 1.00E-04 | 0.396  | 60  | N(1)     | 4.838 | T(0.074) | B(0.039) | 0.01  |
| rs539752226 | 17     | nsyn   | c.T2588G | p.I863S  | 0.57    | 0.64    | 2.46 (0.06-102.04)   | 1.00E+00 | 0  | 2   | 0        | 1.47E-03 | .        | 2.704  | 142 | N(0.842) | 24.7  | D(0.001) | P(0.808) | 0.452 |
| rs199946321 | 17     | nsyn   | c.C2632T | p.R878C  | 0.53    | 0.54    | 4.09 (0.04-381.40)   | 1.00E+00 | 0  | 1   | 0        | 7.34E-04 | 7.49E-05 | 1.177  | 180 | D(0.999) | 34    | D(0)     | D(1)     | 0.049 |
| rs2076222   | 18     | nsyn   | c.C2777A | p.A926D  | 0.00014 | <0.0001 | 5.11 (2.33-11.22)    | 9.99E-01 | 9  | 24  | 8.18E-02 | 1.76E-02 | 2.21E-02 | 3.355  | 126 | P(0.06)  | 24.5  | D(0.002) | D(0.999) | 0.001 |
| rs775023132 | 18     | nsyn   | c.T2813C | p.I938T  | 0.56    | 0.54    | 4.09 (0.04-381.40)   | 1.00E+00 | 0  | 1   | 0        | 7.34E-04 | 1.50E-05 | 2.485  | 89  | D(0.605) | 26.5  | D(0.021) | D(0.979) | 0.035 |
| rs777389254 | 18     | nsyn   | c.G2833A | p.V945M  | 0.54    | 0.54    | 4.09 (0.04-381.40)   | 1.00E+00 | 0  | 1   | 0        | 7.34E-04 | 1.50E-05 | 1.167  | 21  | N(0.986) | 27    | D(0.049) | D(0.999) | 0.032 |
| rs143164025 | 18     | syn    | c.G2871A | p.A957A  | 0.63    | 0.75    | 1.76 (0.06-54.12)    | 1.00E+00 | 0  | 3   | 0        | 2.20E-03 | 2.00E-04 | .      | .   | .        | .     | .        | .        | 0.031 |
| rs140769823 | 19     | nsyn   | c.A2945G | p.D982G  | 0.59    | 0.75    | 1.76 (0.06-54.12)    | 1.00E+00 | 0  | 3   | 0        | 2.20E-03 | 1.60E-03 | 2.079  | 94  | N(0.857) | 17.12 | T(0.574) | B(0)     | 0.578 |
| 1:209791343 | 19     | nsyn   | c.T2960G | p.L987R  | 0.53    | 0.54    | 4.09 (0.04-381.40)   | 1.00E+00 | 0  | 1   | 0        | 7.34E-04 | .        | 3.490  | 102 | D(0.942) | 29    | D(0.006) | P(0.821) | 0.017 |
| rs147527725 | 20     | nsyn   | c.G3068A | p.R1023Q | 0.07    | 0.08    | 12.41 (0.77-199.80)  | 1.00E+00 | 1  | 1   | 9.09E-03 | 7.34E-04 | 3.00E-04 | 0.063  | 43  | N(1)     | 18.77 | T(0.55)  | B(0.244) | 0.171 |
| rs147931502 | 22     | nsyn   | c.A3479G | p.H1160R | 0.52    | 0.54    | 4.09 (0.04-381.40)   | 1.00E+00 | 0  | 1   | 0        | 7.34E-04 | 7.00E-04 | 1.698  | 29  | N(0.998) | 12.25 | T(0.119) | B(0.201) | 0.097 |
| rs745444340 | 22     | nsyn   | c.G3487A | p.G1163R | 0.53    | 0.54    | 4.09 (0.04-381.40)   | 1.00E+00 | 0  | 1   | 0        | 7.34E-04 | 3.00E-05 | -0.135 | 125 | N(1)     | 0.188 | T(0.677) | B(0.003) | 0.032 |
| rs901375494 | Intr15 | .      | G>A      | 0        | 0.50    | 0.54    | 4.09 (0.04-381.40)   | 1.00E+00 | 0  | 1   | 0        | 7.34E-04 | .        | .      | .   | .        | .     | .        | .        | 0.053 |
| rs757259426 | Intr2  | .      | G>A      | 0        | 0.048   | 0.12    | 37.16 (0.40->999.99) | 1.00E+00 | 1  | 0   | 9.09E-03 | 0        | 0.00E+00 | .      | .   | .        | .     | .        | .        | 0.065 |
| rs375846575 | Intr6  | .      | G>C      | 0        | 0.56    | 0.54    | 4.09 (0.04-381.40)   | 1.00E+00 | 0  | 1   | 0        | 7.34E-04 | 6.02E-05 | .      | .   | .        | .     | .        | .        | 0.38  |

|             |   |      |          |         |       |      |                      |          |    |     |          |          |          |        |     |          |       |          |          |       |
|-------------|---|------|----------|---------|-------|------|----------------------|----------|----|-----|----------|----------|----------|--------|-----|----------|-------|----------|----------|-------|
| rs2290862   | 3 | nsyn | c.G355A  | p.A119T | 0.55  | 0.70 | 0.93 (0.62-1.38)     | 1.66E-22 | 41 | 534 | 0.373    | 0.392    | 0.613    | -0.041 | 58  | P(1)     | 8.627 | T(0.446) | B(0)     | 0.09  |
| rs2290861   | 3 | nsyn | c.T377C  | p.L126S | 0.55  | 0.70 | 0.93 (0.62-1.38)     | 1.66E-22 | 41 | 534 | 0.373    | 0.392    | 0.614    | 4.026  | 145 | P(1)     | 18.49 | T(0.455) | B(0)     | 0.304 |
| 17:48557374 | 3 | nsyn | c.A403C  | p.T135P | 0.54  | 0.54 | 4.09 (0.04-381.40)   | 1.00E+00 | 0  | 1   | 0        | 7.34E-04 | .        | 0.959  | 38  | D(0.975) | 23    | D(0.002) | D(0.999) | 0.066 |
| rs201488851 | 4 | nsyn | c.C512T  | p.T171M | 0.50  | 0.54 | 4.09 (0.04-381.40)   | 1.00E+00 | 0  | 1   | 0        | 7.34E-04 | 2.00E-04 | 1.188  | 81  | N(0.983) | 24    | T(0.105) | D(0.996) | 0.002 |
| rs7210579   | 4 | syn  | c.A582G  | p.V194V | 0.55  | 0.62 | 1.12 (0.72-1.75)     | 4.12E-11 | 28 | 321 | 0.255    | 0.236    | 0.243    | .      | .   | .        | .     | .        | .        | 0.083 |
| rs137932823 | 4 | nsyn | c.G745C  | p.D249H | 0.53  | 0.54 | 4.09 (0.04-381.40)   | 1.00E+00 | 0  | 1   | 0        | 7.34E-04 | 1.00E-03 | 3.211  | 81  | D(0.939) | 24.3  | D(0.003) | P(0.74)  | 0.02  |
| rs541139014 | 4 | nsyn | c.C749T  | p.P250L | 0.031 | 0.12 | 37.16 (0.40->999.99) | 1.00E+00 | 1  | 0   | 9.09E-03 | 0        | 4.60E-05 | 1.761  | 98  | D(0.999) | 19.12 | T(0.059) | P(0.895) | 0.21  |
| rs143685560 | 5 | nsyn | c.G895A  | p.V299I | 0.021 | 0.12 | 37.16 (0.40->999.99) | 1.00E+00 | 1  | 0   | 9.09E-03 | 0        | 2.00E-04 | 0.130  | 29  | N(1)     | 9.465 | T(1)     | B(0.028) | 0.099 |
| rs778299565 | 6 | nsyn | c.G950A  | p.R317Q | 0.039 | 0.12 | 37.16 (0.40->999.99) | 1.00E+00 | 1  | 0   | 9.09E-03 | 0        | 4.62E-05 | 3.475  | 43  | D(0.997) | 26.6  | D(0.038) | D(0.992) | 0.281 |
| rs374609288 | 7 | nsyn | c.C1072G | p.L358V | 0.52  | 0.54 | 4.09 (0.04-381.40)   | 1.00E+00 | 0  | 1   | 0        | 7.34E-04 | 2.00E-04 | 1.226  | 32  | N(0.997) | 22.9  | D(0.007) | B(0.201) | 0.079 |
| 17:48561127 | 0 | .    | G>A      | 0       | 0.53  | 0.54 | 4.09 (0.04-381.40)   | 1.00E+00 | 0  | 1   | 0        | 7.34E-04 | .        | .      | .   | .        | .     | .        | .        | 0.236 |

LAMB3  
(NM\_00101740





## Script file S1

```
#Convert data to plink files and make a dummy gene list based on the
variants in the bim files
#In the following format:
#dummygene      SNP1
#dummygene      SNP2
awk '{print("dummygene"\t"$2)}' input.bim | sort -k2 -u >
SNPsets_dummy.txt

#Generate weight file based on minor allele frequency
R
library(SKAT)
#Generate the File.SSD and File.Info
Generate_SSD_SetID("input.bed", "input.bim", "input.fam",
"SNPsets_dummy.txt", "File.SSDdummy", "File.Infodummy")
#read the covariate file and fam file if applicable
FAM_Cov<-Read_Plink_FAM_Cov("input.fam", "input_cov.txt",
Is.binary=TRUE, flag1=0, cov_header=TRUE)
SSD.INFOdummy<-Open_SSD("File.SSDdummy", "File.Infodummy")
#Get genotype matrix of the dummy geneset
dummy_geneset<-Get_Genotypes_SSD(SSD.INFOdummy, 1, is_ID = TRUE)
weight<-Get_Logistic_Weights(dummy_geneset, par=0.07, par2=150)
weights<-data.frame(weight)
weights[,2] <- colnames(dummy_geneset)
weights = weights[, c(2,1)]
write.table(weights, file="snp_weights.txt", col.names=FALSE,
row.names=FALSE, sep="\t", quote = FALSE)

#perform single variant association with dummy geneset dataset
#Define the covariates if applicable
Phenotype = FAM_Cov$Phenotype
PC1 = FAM_Cov$PC1
PC2 = FAM_Cov$PC2
Sex = FAM_Cov$Sex
#Run the null model
obj<-SKAT_Null_Model_MomentAdjust(Phenotype ~ PC1 + PC2 + Sex,
type.Resampling="bootstrap.fast")
#Run the loop through the genotype matrix and output the p-values
single_pvalue <- NULL
for(snp in colnames(dummy_geneset)){out <-
SKATBinary_Single(dummy_geneset[,snp], obj); single_pvalue <-
rbind(single_pvalue, data.frame(snp, out$p.value, out$method.bin,
out$m))}
#print the output file
write.table(single_pvalue, file="Single_pvalue_all.txt",
col.names=TRUE, row.names=FALSE, sep="\t", quote = FALSE)

#Run the burden, SKAT and SKAT-O test using the snp_weights_file.txt
Generate_SSD_SetID("input.bed", "input.bim", "input.fam",
"groupfile.txt", "File.SSD_groupfile", "File.Info_groupfile")
#read the covariate file and fam file if applicable
FAM_Cov<-Read_Plink_FAM_Cov("input.fam", "input_cov.txt",
Is.binary=TRUE, flag1=0, cov_header=TRUE)
SSD.INFO_groupfile<-Open_SSD("File.SSD_groupfile",
"File.Info_groupfile")
Phenotype = FAM_Cov$Phenotype
PC1 = FAM_Cov$PC1
PC2 = FAM_Cov$PC2
Sex = FAM_Cov$Sex.x
obj<-SKAT_Null_Model_MomentAdjust(Phenotype ~ Sex + PC1 + PC2,
type.Resampling="bootstrap.fast")
custom_weights<-Read_SNP_WeightFile("snp_weights.txt")
```

```

#Burden test
out.burden<-SKATBinary.SSD.All(loaded_SSD, obj, method="Burden",
obj.SNPWeight=custom_weights, kernel="linear.weighted")
#SKAT test
out.skate<-SKATBinary.SSD.All(loaded_SSD, obj, method="SKAT",
obj.SNPWeight=custom_weights, kernel="linear.weighted")
#SKAT-O test
out.skato<-SKATBinary.SSD.All(loaded_SSD, obj, method="SKATO",
obj.SNPWeight=custom_weights, kernel="linear.weighted")

#keep only genes with more than 2 variants and perform correction
for multiple testing
out.burden_select <- out.burden[out.burden$N.Marker.Test>1,]
out.burden_select$FDR <- p.adjust(out.burden_select$P.value,
method="fdr")
out.burden_select$Bonf <- p.adjust(out.burden_select$P.value,
method="bonferroni")
write.table(out.burden_select, file="burden_output_groupfile.txt",
col.names=TRUE, row.names=FALSE, sep="\t", quote = FALSE)

out.skate_select <- out.skate[out.skate$N.Marker.Test>1,]
out.skate_select$FDR <- p.adjust(out.skate_select$P.value,
method="fdr")
out.skate_select$Bonf <- p.adjust(out.skate_select$P.value,
method="bonferroni")
write.table(out.skate_select, file="skate_output_groupfile.txt",
col.names=TRUE, row.names=FALSE, sep="\t", quote = FALSE)

out.skato_select <- out.skato[out.skato$N.Marker.Test>1,]
out.skato_select$FDR <- p.adjust(out.skato_select$P.value,
method="fdr")
out.skato_select$Bonf <- p.adjust(out.skato_select$P.value,
method="bonferroni")
write.table(out.skato_select, file="skato_output_groupfile.txt",
col.names=TRUE, row.names=FALSE, sep="\t", quote = FALSE)

#plot the data in CMplot
library(CMplot)
ref_genes=read.table("genes_location.txt", header=T)
data_combined1 <- merge(out.burden_select[,c(1,2)],
out.skate_select[,c(1,2)], by="SetID", all=TRUE)
data_combined2 <- merge(data_combined1, out.skato_select[,c(1,2)],
by="SetID", all=TRUE)
data_combined3 <- merge(ref_genes, data_combined2 , by=1,
no.dups=TRUE)
colnames(data_combined3) =
c("GENE", "CHR", "BP", "burden", "skate", "skato")
nrow(data_combined3)
#genome-wide significant line --> 0.05/nrow=pvalue_cutoff
data_combined3[is.na(data_combined3)] <- 1

CMplot(data_combined3, plot.type="m", multitracks=TRUE,
threshold=c(pvalue_cutoff,suggestive_line),threshold.lty=c(1,2),
threshold.lwd=c(1,1), threshold.col=c("black","grey"),
amplify=TRUE,bin.size=1e6,
chr.den.col=NULL,
signal.col=c("red","green"),signal.cex=c(1,1),
file="pdf",memo="results")

```
